# Supplementary material for: Leaf economics spectrum in rice: leaf anatomical, biochemical, and physiological trait trade-offs
Source: PubMed Central journal article supplement (PMC6255696; doi:10.1093/jxb/ery322), 2018-09-05
Supplement: ery322_suppl_supplementary_material.pdf [file ery322_suppl_supplementary_material.pdf]

**The leaf economics spectrum in rice: leaf anatomical, biochemical and physiological traits trade-offs.** Dongliang Xiong & Jaume Flexas

**Supplementary data**

Table S1. List of leaf traits in this study, and symbols and units adopted.

|              | Symbol               | Trait                                                                                              | Unit                                               |
|--------------|----------------------|----------------------------------------------------------------------------------------------------|----------------------------------------------------|
| Function     | $A$                  | Light-saturated photosynthetic rate                                                                | $\mu\text{mol m}^{-2} \text{s}^{-1}$               |
|              | $g_s$                | Stomatal conductance to $\text{CO}_2$                                                              | $\text{mol m}^{-2} \text{s}^{-1}$                  |
|              | $g_m$                | Mesophyll conductance                                                                              | $\text{mol m}^{-2} \text{s}^{-1}$                  |
|              | $K_{\text{leaf}}$    | Leaf hydraulic conductance                                                                         | $\text{mmol m}^{-2} \text{s}^{-1} \text{MPa}^{-1}$ |
|              | $V_{\text{cmax}}$    | Maximum carboxylation efficiency                                                                   | $\mu\text{mol m}^{-2} \text{s}^{-1} \mu\text{mol}$ |
|              | $J_{\text{max}}$     | Maximum rate of electron transport                                                                 | $\text{m}^{-2} \text{s}^{-1}$                      |
|              | $A_m$                | Light-saturated photosynthetic rate per leaf mass                                                  | $\text{nmol g}^{-1} \text{s}^{-1}$                 |
|              | $g_{\text{sm}}$      | Stomatal conductance to $\text{CO}_2$ per leaf mass                                                | $\text{nmol kg}^{-1} \text{s}^{-1}$                |
|              | $g_{\text{mm}}$      | Mesophyll conductance per leaf mass                                                                | $\text{nmol kg}^{-1} \text{s}^{-1}$                |
|              | $K_{\text{leafm}}$   | Leaf hydraulic conductance                                                                         | $\text{mmol g}^{-1} \text{s}^{-1} \text{MPa}^{-1}$ |
| Biochemistry | $N_a$                | Nitrogen concentration per leaf area                                                               | $\text{g m}^{-2}$                                  |
|              | $N_m$                | Nitrogen concentration per leaf mass                                                               | %                                                  |
|              | Rubisco              | Rubisco concentration per leaf area                                                                | $\text{g m}^{-2}$                                  |
|              | Rubisco <sub>m</sub> | Rubisco concentration per leaf mass                                                                | $\text{g g}^{-1}$                                  |
| Anatomy      | LMA                  | Leaf mass per leaf area                                                                            | $\text{g m}^{-2}$                                  |
|              | VLA                  | Leaf vein length per leaf area                                                                     | $\text{mm mm}^{-2}$                                |
|              | VLA <sub>m</sub>     | Leaf vein length per leaf mass                                                                     | $\text{mm mg}^{-1}$                                |
|              | LT                   | Leaf thickness                                                                                     | mm                                                 |
|              | LD                   | Leaf density                                                                                       | $\text{mg mm}^{-3}$                                |
|              | $f_{\text{IAS}}$     | Fraction of leaf mesophyll volume occupied by intercellular air space                              | %                                                  |
|              | $T_{\text{cw}}$      | Cell wall thickness                                                                                | $\mu\text{m}$                                      |
|              | $S_m$                | Total mesophyll cell surface area exposed to intercellular air space per unit of leaf surface area | $\text{m}^{-2} \text{m}^{-2}$                      |
|              | $S_c$                | Total chloroplasts surface area exposed to intercellular air space per unit of leaf surface area   | $\text{m}^{-2} \text{m}^{-2}$                      |
|              | Efficiency           | PNUE                                                                                               | Photosynthetic N use efficiency                    |

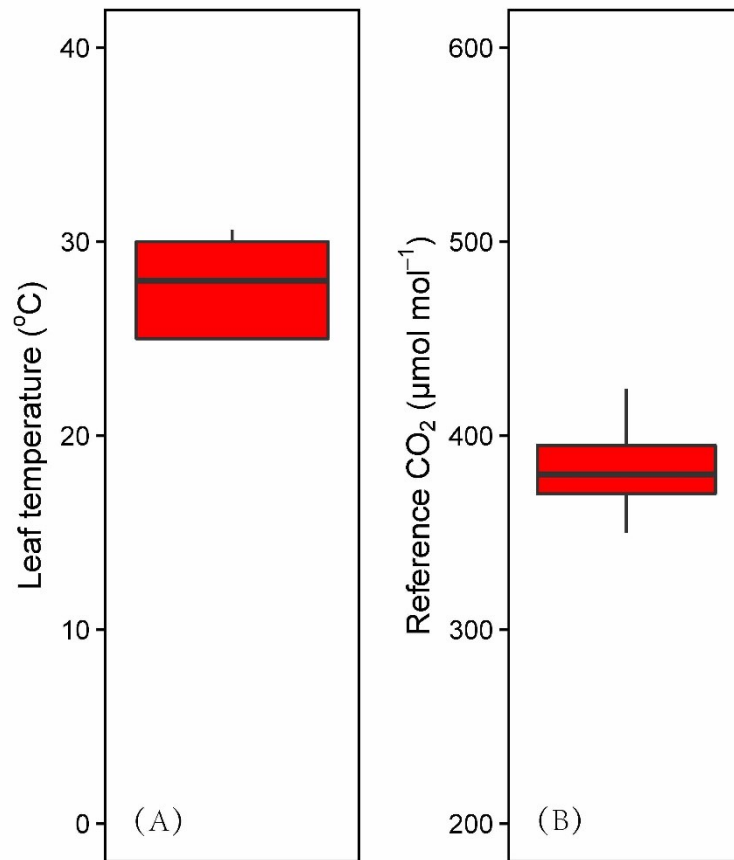

Figure S1 Leaf temperature (A) and the reference CO<sub>2</sub> concentration inside cuvette (B) for gas exchange measurements.

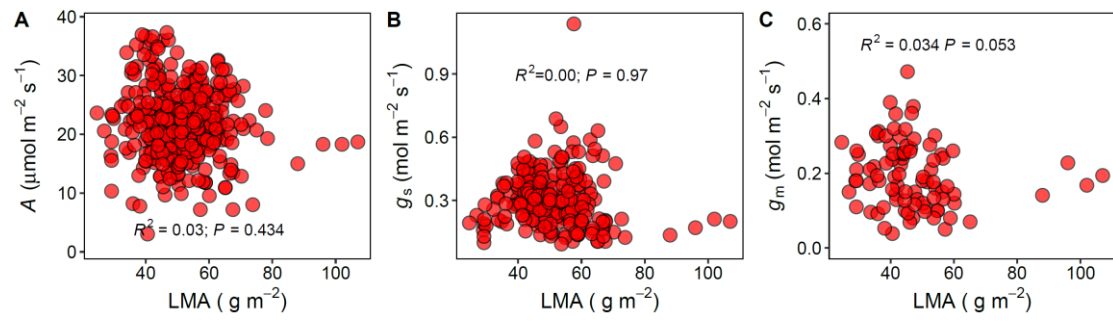

Fig. S2 Influences of the leaf mass per area (LMA) on the light-saturated photosynthetic rate ( $A$ ), the stomatal conductance ( $g_s$ ) and the mesophyll conductance ( $g_m$ ).

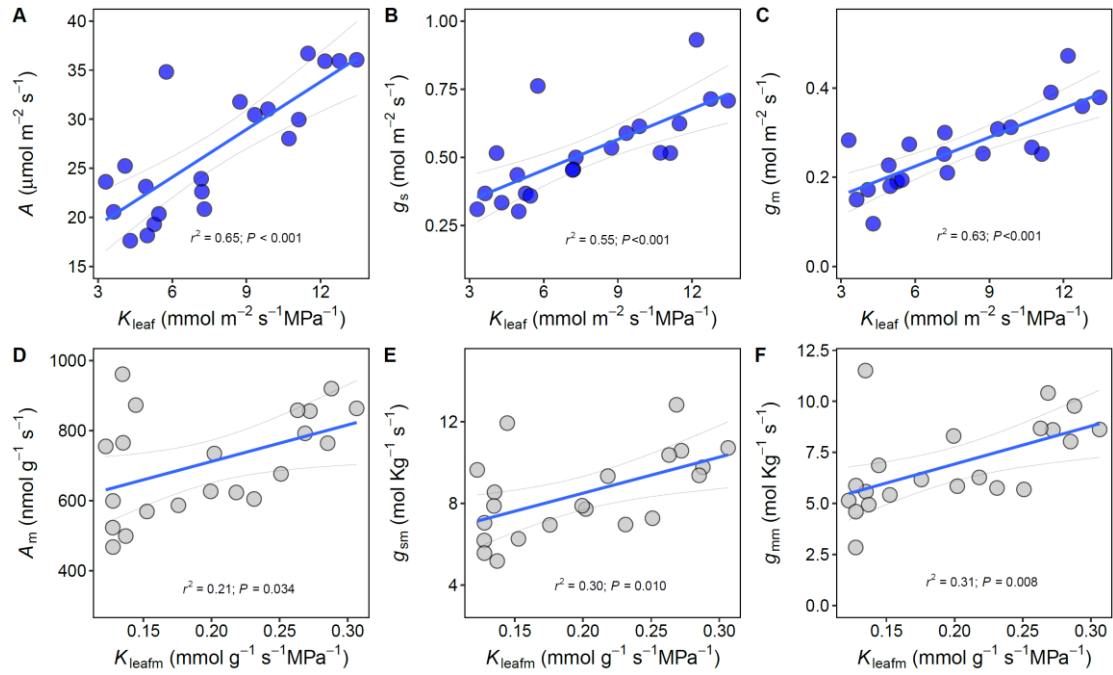

Figure S3. Correlations of the leaf hydraulic conductance ( $K_{leaf}$ ) to (A, D) the light-saturated photosynthetic rate ( $A$ ), (B, E) the stomatal conductance ( $g_s$ ) and (C, F) the mesophyll conductance ( $g_m$ ) in rice. A-C in the area-base and D-F in the mass-base.

The shaded area indicates the 95% CI of the fitting.

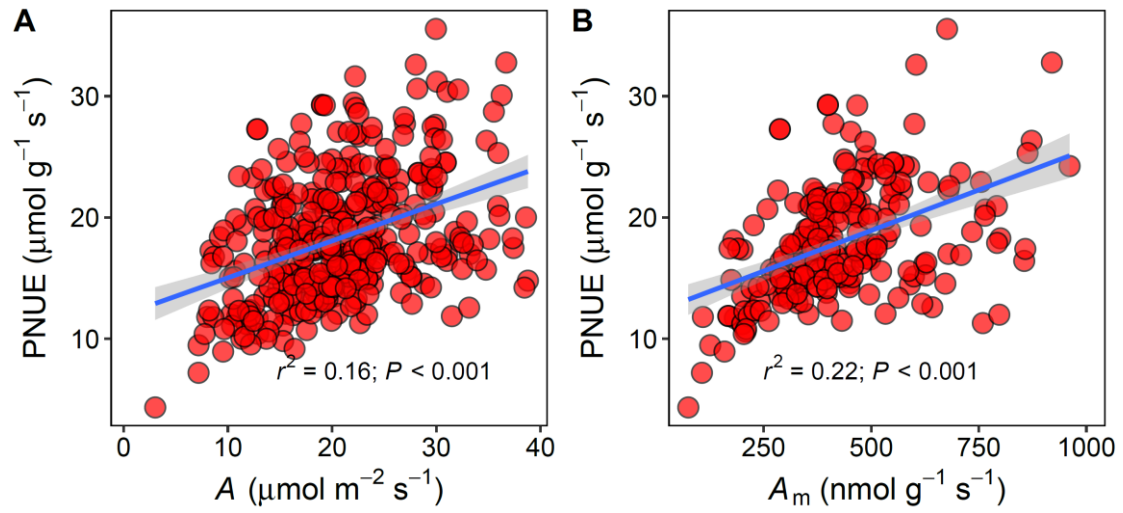

Figure S4. Correlations (A) between the area-based light-saturated photosynthetic rate ( $A$ ) and the photosynthetic N use efficiency (PNUE); and (B) between the mass-based light-saturated photosynthetic rate ( $A_m$ ) and the PNUE.

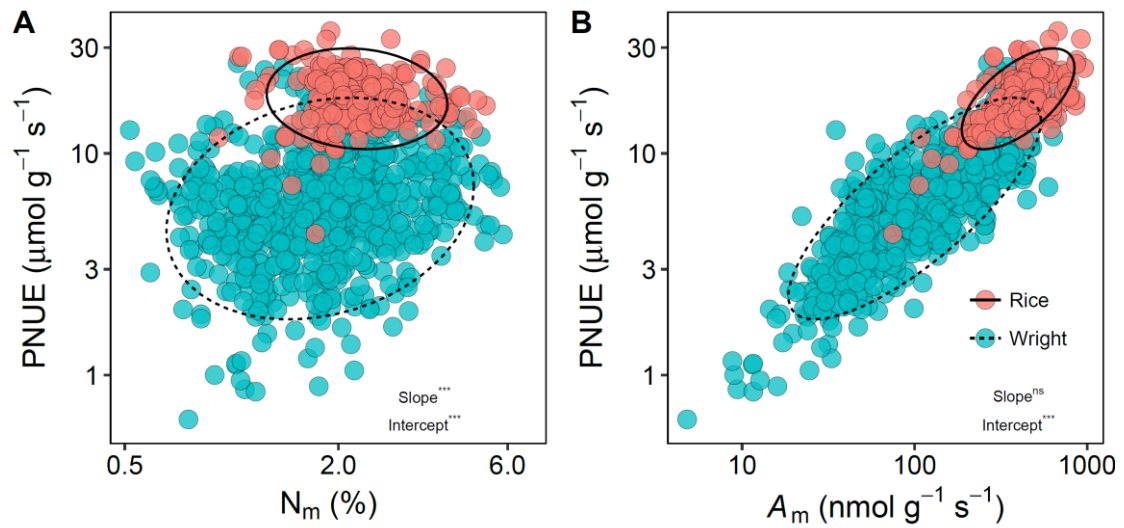

Figure S5. Effects of (A) the N concentration per leaf mass ( $N_m$ ) and the mass-based light-saturated photosynthetic rate ( $A_m$ ) on the photosynthetic N use efficiency (PNUE). Green circles represent the data from Glopnet (Wright *et al.*, 2004) and red circles represent rice.

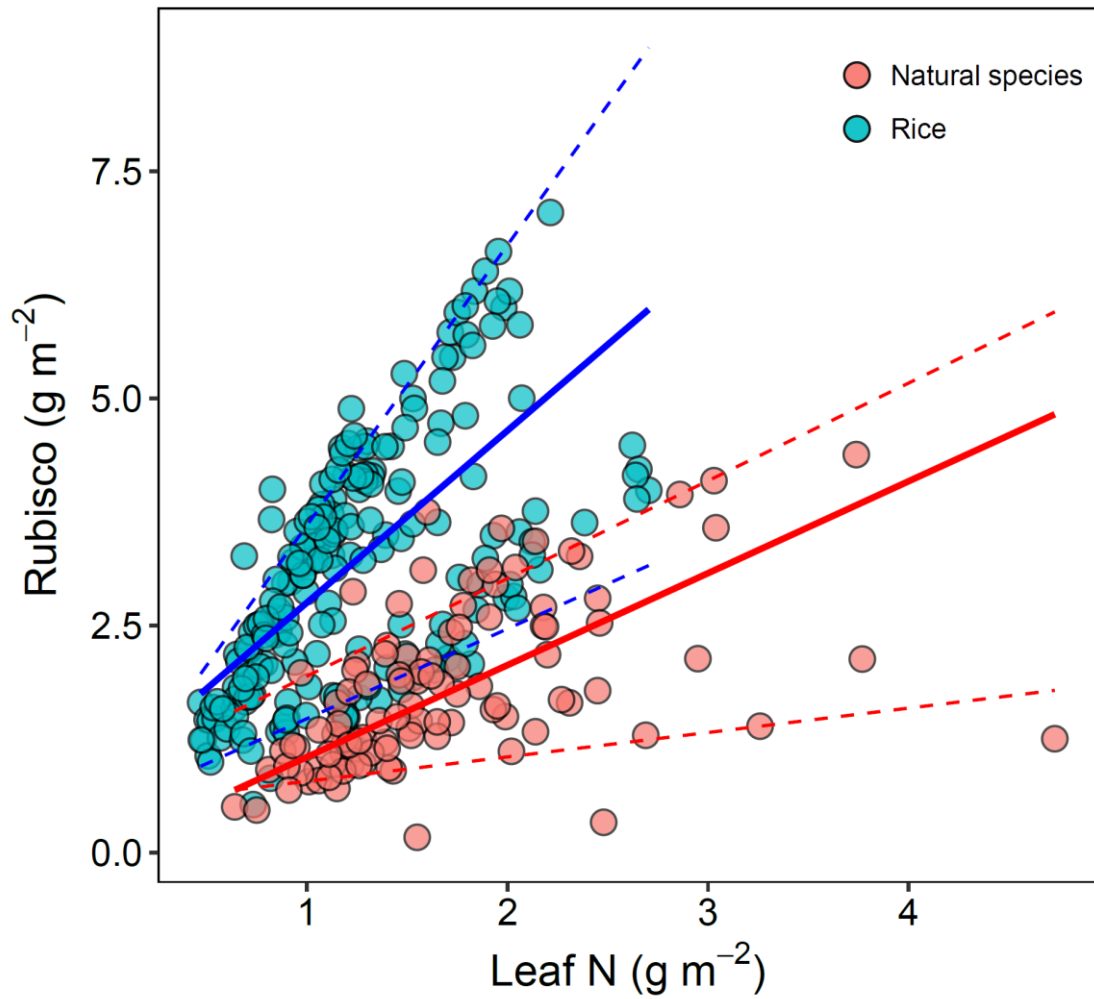

Figure S6. The correlation between Rubisco content and leaf N content within rice or among natural species (data from Onoda *et al.*, 2017). The lines were fitted using quantile regression model. Solid lines represent the quantile of 0.5 and dot lines represent the quantiles of 0.1 and 0.9.



### Literature used in this study

1. **Adachi M, Hasegawa T, Fukayama H, Tokida T, Sakai H, Matsunami T, Nakamura H, Sameshima R, Okada M.** 2014a. Soil and water warming accelerates phenology and down-regulation of leaf photosynthesis of rice plants grown under free-air CO<sub>2</sub> enrichment (FACE). *Plant and Cell Physiology* **55**, 370-380.
2. **Adachi S, Baptista LZ, Sueyoshi T, Murata K, Yamamoto T, Ebitani T, Ookawa T, Hirasawa T.** 2014b. Introgression of two chromosome regions for leaf photosynthesis from an indica rice into the genetic background of a japonica rice. *Journal of Experimental Botany* **65**, 2049-2056.
3. **Adachi S, Nakae T, Uchida M, Soda K, Takai T, Oi T, Yamamoto T, Ookawa T, Miyake H, Yano M, Hirasawa T.** 2013. The mesophyll anatomy enhancing CO<sub>2</sub> diffusion is a key trait for improving rice photosynthesis. *Journal of Experimental Botany* **64**, 1061-1072.
4. **Giuliani R, Koteyeva N, Voznesenskaya E, Evans MA, Cousins AB, Edwards GE.** 2013. Coordination of leaf photosynthesis, transpiration, and structural traits in rice and wild relatives (*Genus Oryza*). *Plant Physiology* **162**, 1632-1651.
5. **Gong HY, Li Y, Fang G, Hu DH, Jin WB, Wang ZH, Li YS.** 2015. Transgenic rice expressing *Ictb* and *FBP/Sbpase* derived from cyanobacteria exhibits enhanced photosynthesis and mesophyll conductance to CO<sub>2</sub>. *Plos One* **10**, e0140928.
6. **Guo S, Chen G, Zhou Y, Shen Q.** 2007. Ammonium nutrition increases photosynthesis rate under water stress at early development stage of rice (*Oryza sativa* L.). *Plant and Soil* **296**(1-2): 115-124.
7. **Harmens H, Marriott DJ, Ashenden TW.** 2005. Photosynthetic capacity and productivity of CO<sub>2</sub>-enriched rice (*Oryza sativa* L.) under field conditions. *Journal of Crop Improvement* **13**, 55-72.
8. **Hirasawa T, Ozawa S, Taylaran RD, Ookawa T.** 2010. Varietal differences in photosynthetic rates in rice plants, with special reference to the nitrogen content of leaves. *Plant Production Science* **13**, 53-57.
9. **Huang M, Shan S, Zhou X, Chen J, Cao F, Jiang L, Zou Y.** 2016. Leaf photosynthetic performance related to higher radiation use efficiency and grain yield in hybrid rice. *Field Crops Research* **193**, 87-93.
10. **Huang G., Zhang Q., Wei X., Peng S. & Li Y.** 2017 Nitrogen Can Alleviate the Inhibition of Photosynthesis Caused by High Temperature Stress under Both Steady-State and Flecked Irradiance. *Front Plant Sci*, **8**, 945.
11. **Kanemura T, Homma K, Ohsumi A, Shiraiwa T, Horie T.** 2007. Evaluation of genotypic variation in leaf photosynthetic rate and its associated factors by using rice diversity research set of germplasm. *Photosynthesis Research* **94**, 23-30.
12. **Kumagai E, Araki T, Kubota F.** 2007. Effects of nitrogen supply restriction on gas exchange and photosystem 2 function in flag leaves of a traditional low-yield cultivar and a recently improved high-yield cultivar of rice (*Oryza sativa* L.). *Photosynthetica* **45**, 489-495.
13. **Kumagai E, Araki T, Kubota F.** 2009. Characteristics of gas exchange and chlorophyll fluorescence during senescence of flag leaf in different rice (*Oryza sativa* L.) cultivars grown under nitrogen-deficient condition. *Plant Production Science* **12**, 285-292.
14. **Li Y, Gao YX, Xu XM, Shen QR, Guo SW.** 2009. Light-saturated photosynthetic rate in high-nitrogen rice (*Oryza sativa* L.) leaves is related to chloroplastic CO<sub>2</sub> concentration. *Journal of Experimental Botany* **60**, 2351-2360.

15. **Li Y, Ren B, Ding L, Shen Q, Peng S, Guo S.** 2013. Does chloroplast size influence photosynthetic nitrogen use efficiency? *Plos One* **8**, e62036.
16. **Li Y, Ren B, Yang X, Xu G, Shen Q, Guo S.** 2012a. Chloroplast downsizing under nitrate nutrition restrained mesophyll conductance and photosynthesis in rice (*Oryza sativa* L.) under drought conditions. *Plant and Cell Physiology* **53**, 892-900.
17. **Li Y, Yang X, Ren B, Shen QR, Guo SW.** 2012b. Why nitrogen use efficiency decreased under high nitrogen supply of rice seedlings (*Oryza sativa* L.)? *Journal of Plant Growth Regulation* **31**: 47-52.
18. **Liu X, Li Y.** 2015. Varietal difference in the correlation between leaf nitrogen content and photosynthesis in rice (*Oryza sativa* L.) plants is related to specific leaf weight. *Journal of Integrative Agriculture* **15**, 2002-2011.
19. **Makino A, Nakano H, Mae T.** 1994a. Responses of ribulose-1,5-bisphosphate carboxylase, cytochrome f, and sucrose synthesis enzymes in rice leaves to leaf nitrogen and their relationships to photosynthesis. *Plant Physiol* **105**(1): 173-179.
20. **Makino A, Nakano H, Mae T.** 1994b. Effects of growth temperature on the responses of ribulose-1,5-bisphosphate carboxylase, electron transport components, and sucrose synthesis enzymes to leaf nitrogen in rice, and their relationships to photosynthesis. *Plant Physiol* **105**(4): 1231-1238.
21. **Makino A, Sato T, Nakano H, Mae T.** 1997a. Leaf photosynthesis, plant growth and nitrogen allocation in rice under different irradiances. *Planta* **203**(3): 390-398.
22. **Makino A, Shimada T, Takumi S, Kaneko K, Matsuoka M, Shimamoto K, Nakano H, Miyao-Tokutomi M, Mae T, Yamamoto N.** 1997b. Does decrease in Ribulose-1,5-Bisphosphate Carboxylase by antisense *RbcS* lead to a higher N-use efficiency of photosynthesis under conditions of saturating CO<sub>2</sub> and light in rice plants? *Plant Physiology* **114**, 483-491.
23. **Nakano H, Makino A, Mae T.** 1997. The effect of elevated partial pressures of CO<sub>2</sub> on the relationship between photosynthetic capacity and N content in rice leaves. *Plant Physiology* **115**, 191-198.
24. **Ohsumi A, Hamasaki A, Nakagawa H, Yoshida H, Shiraiwa T, Horie T.** 2007. A model explaining genotypic and ontogenetic variation of leaf photosynthetic rate in rice (*Oryza sativa*) based on leaf nitrogen content and stomatal conductance. *Annals of Botany* **99**, 265-273.
25. **Resurreccion A, Makino A, Bennett J, Mae T.** 2001 Effects of sulfur nutrition on the growth and photosynthesis of rice, *Soil Science and Plant Nutrition*, **47**, 611-620
26. **Scafaro AP, Von Caemmerer S, Evans JR, Atwell BJ.** 2011. Temperature response of mesophyll conductance in cultivated and wild *Oryza* species with contrasting mesophyll cell wall thickness. *Plant, Cell and Environment* **34**, 1999-2008.
27. **Seneweera S, Makino A, Hirotsu N, Norton R, Suzuki Y.** 2011. New insight into photosynthetic acclimation to elevated CO<sub>2</sub>: The role of leaf nitrogen and ribulose-1,5-bisphosphate carboxylase/oxygenase content in rice leaves. *Environmental and Experimental Botany* **71**, 128-136.
28. **Shimono H, Suzuki K, Aoki K, Hasegawa T, Okada M.** 2010 Effect of panicle removal on photosynthetic acclimation under elevated CO<sub>2</sub> in rice. *Photosynthetica* **48**, 530-536
29. **Shimoda S, Maruyama A.** 2014. Rice varietal differences in responses of stomatal gas exchange to supplemental nitrogen application. *Photosynthetica* **52**(3): 397-403.

30. **Sudo E, Makino A, Mae T.** 2003. Differences between rice and wheat in ribulose-1,5-bisphosphate regeneration capacity per unit of leaf-N content. *Plant, Cell and Environment* **26**, 255-263.
31. **Sun, J, Ye M, Peng S, Li Y.** 2016 Nitrogen can improve the rapid response of photosynthesis to changing irradiance in rice (*Oryza sativa* L.) plants. *Scientific Reports* **6**, 31305
32. **Suzuki Y, Miyamoto T, Yoshizawa R, Mae T, Makino A.** 2009. Rubisco content and photosynthesis of leaves at different positions in transgenic rice with an overexpression of RBCS. *Plant, Cell and Environment* **32**, 417-427.
33. **Suzuki Y, Ohkubo M, Hatakeyama H, Ohashi K, Yoshizawa R, Kojima S, Hayakawa R, Yamaya T, Mae T, Makino A.** 2007 Increased Rubisco content in transgenic rice transformed with the 'Sense' *rbcS* gene *Plant Cell & Physiology* **48**, 626-637.
34. **Taylaran RD, Adachi S, Ookawa T, Usuda H, Hirasawa T.** 2011. Hydraulic conductance as well as nitrogen accumulation plays a role in the higher rate of leaf photosynthesis of the most productive variety of rice in Japan. *Journal of Experimental Botany* **62**, 4067-4077.
35. **Urairi C, Tanaka Y, Hirooka Y, Homma K, Xu Z, Shiraiwa T.** 2016. Response of the leaf photosynthetic rate to available nitrogen in erect panicle-type rice (*Oryza sativa* L.) cultivar, Shennong265. *Plant Production Science* **19**, 420-426.
36. **Xiong D, Flexas J, Yu T, Peng S, Huang J.** 2016a. Leaf anatomy mediates coordination of leaf hydraulic conductance and mesophyll conductance to CO<sub>2</sub> in *Oryza*. *New Phytologist*, 10.1111/nph.14186.
37. **Xiong D, Liu X, Liu L, Douthe C, Li Y, Peng S, Huang J.** 2015a. Rapid responses of mesophyll conductance to changes of CO<sub>2</sub> concentration, temperature and irradiance are affected by N supplements in rice. *Plant, Cell and Environment* **38**, 2541-2550.
38. **Xiong D, Wang D, Liu X, Peng S, Huang J, Li Y.** 2016b. Leaf density explains variation in leaf mass per area in rice between cultivars and nitrogen treatments. *Annals of Botany* **117**, 963-971.
39. **Xiong D, Yu T, Ling X, Fahad S, Peng S, Li Y, Huang J.** 2015b. Sufficient leaf transpiration and nonstructural carbohydrates are beneficial for high-temperature tolerance in three rice (*Oryza sativa*) cultivars and two nitrogen treatments. *Functional Plant Biology* **42**, 347-356.
40. **Xiong D, Yu T, Liu X, Li Y, Peng S, Huang J.** 2015c. Heterogeneity of photosynthesis within leaves is associated with alteration of leaf structural features and leaf N content per leaf area in rice. *Functional Plant Biology* **42**, 687-696.
41. **Xiong D, Yu T, Zhang T, Li Y, Peng S, Huang J.** 2015d. Leaf hydraulic conductance is coordinated with leaf morpho-anatomical traits and nitrogen status in the genus *Oryza*. *Journal of Experimental Botany* **66**, 741-748.
42. **Xiong D., Douthe C. & Flexas J.** 2018 Differential coordination of stomatal conductance, mesophyll conductance, and leaf hydraulic conductance in response to changing light across species. *Plant, Cell and Environment*, **41**, 436-450.
43. **Xue W, Nay-Htoon B, Lindner S, Dubbert M, Otieno D, Ko J, Werner C, Tenhunen J.** 2016. Soil water availability and capacity of nitrogen accumulation influence variations of intrinsic water use efficiency in rice. *Journal of Plant Physiology* **193**, 26-36.
44. **Yamori W, Makino A, Shikanai T.** 2016. A physiological role of cyclic electron transport around photosystem I in sustaining photosynthesis under fluctuating light in rice. *Scientific Reports* **6**, 20147.

45. **Yamori W, Nagai T, Makino A. 2011a.** The rate-limiting step for CO<sub>2</sub> assimilation at different temperatures is influenced by the leaf nitrogen content in several C<sub>3</sub> crop species. *Plant, Cell and Environment* **34**(5): 764-777.
46. **Yamori W, Sakata N, Suzuki Y, Shikanai T, Makino A. 2011b.** Cyclic electron flow around photosystem i via chloroplast NAD(P)H dehydrogenase (NDH) complex performs a significant physiological role during photosynthesis and plant growth at low temperature in rice. *Plant Journal* **68**(6): 966-976.
47. **Ye M., Peng S., and Li Y.** 2018 Intraspecific variation in photosynthesis is positively 1 related to photosynthetic nitrogen use efficiency in rice (*Oryza sativa* L.) plants. *Photosynthetica* (in press)
48. **Yu H, Murchie EH, González-Carranza ZH, Pyke KA, Roberts JA.** 2015. Decreased photosynthesis in the *erect panicle 3 (ep3)* mutant of rice is associated with reduced stomatal conductance and attenuated guard cell development. *Journal of Experimental Botany* **66**, 1543-1552.
49. **Zhao M, Ding Z, Lafitte R, Sacks E, Dimayuga G, Holt D.** 2010 Photosynthetic characteristics in *Oryza* species. *Photosynthetica* **48**, 234-240.
50. **Zhu C, Ziska L, Zhu J, Zeng Q, Xie Z, Tang H, Jia X, Hasegawa T.** 2012 The temporal and species dynamics of photosynthetic acclimation in flag leaves of rice (*Oryza sativa*) and wheat (*Triticum aestivum*) under elevated carbon dioxide. *Physiologia Plantarum* **145**, 395–405
